# Supplementary material for: Clinical characteristics, CT signs, and pathological findings of Pyrrolizidine alkaloids-induced sinusoidal obstructive syndrome: a retrospective study
Source: BMC Gastroenterol. 2020 Feb 4;20:30. doi: 10.1186/s12876-020-1180-0 (PMC7001201; doi:10.1186/s12876-020-1180-0)
Supplement: Supplementary file 1 — Additional file 1: Table S1. The results of liver functional test at the time of the liver biopsy [file 12876_2020_1180_MOESM1_ESM.docx]

**Supplementary data**

**Clinical characteristics, CT Signs, and Pathological Findings of Pyrrolizidine Alkaloids-induced Sinusoidal Obstructive Syndrome: a retrospective study**

Fang Liu1, Xinxin Rong 2, Hui Guo3, Dong Xu 4, Chang Liu2, Lingling Meng 2, Xianqian Yang2, Tingting Guo5, Xuefeng Kan5, Yuhu Song2

1Institute of Hematology, Union Hospital, Tongji Medical College, Huazhong University of Science and Technology, Wuhan 430022, China;

2 Division of Gastroenterology, Union Hospital, Tongji Medical College, Huazhong University of Science and Technology, Wuhan 430022, China;

3Institute of Organ Transplantation, Tongji Hospital, Tongji Medical College, Huazhong University of Science and Technology; Wuhan 430030, China;

4Department of Infectious Diseases, Tongji Hospital, Tongji Medical College, Huazhong University of Science and Technology; Wuhan 430030, China;

5Department of Radiology, Union Hospital, Tongji Medical College, Huazhong University of Science and Technology, Wuhan 430022, China.

**Table.S1**.the results of liver functional test at the time of the liver biopsy.

| Variables | Number patients with available data | Value |
| --- | --- | --- |
| ALT, U/L | 11 | 94.36±123.57 |
| AST, U/L | 12 | 83.42±49.67 |
| ALP, U/L | 11 | 208.82±105.73 |
| γ-GT, U/L | 11 | 167.55±113.68 |
| T-BIL, μmol/L | 11 | 101.23±161.38 |
| Albumin, g/L | 11 | 31.46±7.04 |

Normal ranges: alanine aminotransferase (ALT) : 5-35 U/L; aspartate aminotransferase (AST):8-40U/L; alkaline phosphatase (ALP) 40-150 U/L; γ-glutamyl transpeptidase (γ-GT) 7-32 U/L; total bilirubin (T-BIL): 5.1-19 μmol/L; [albumin](file:///D:\Program%2520Files\Youdao\Dict\6.3.69.5012\resultui\frame\javascript:void(0);): 35-55g/L.
